# Supplementary material for: A quenching electrochemiluminescence energy resonance transfer system based on CdS and COFs for the ultrasensitive detection of CA242
Source: Royal Society of Chemistry journal article supplement (doi:10.1039/d4nj02572e), 2024-01-01
Supplement: d4nj02572e1.pdf [file d4nj02572e1.pdf]

1  
2  
3  
4  
5  
6  
7  
8  
9  
10  
11  
12  
13  
14  
15  
16  
17  
18  
19  
20  
21  
22  
23  
24  
25

## Supplementary Information

### **A quenching electrochemiluminescence energy resonance transfer system based on CdS and COFs for ultrasensitive detection of CA242**

Baokun Han <sup>a</sup>, Shujun Wang <sup>a,\*</sup>, Fengqian Xie <sup>a</sup>, Shuangna Wang <sup>a</sup>, Feng Tang <sup>a</sup>, Shaowen Xiang <sup>b,\*</sup>, Yueyuan Li <sup>a</sup>, Ping Wang <sup>a</sup>, Yueyun Li <sup>a</sup>, Qing Liu <sup>a,\*</sup>, Yuying Liu <sup>a,\*</sup>

<sup>a</sup> School of Chemistry and Chemical Engineering, Shandong University of Technology, Zibo, 255049, P.R. China

<sup>b</sup> Stomatological Hospital, School of Stomatology, Southern Medical University, Guangzhou, 510280, P.R. China

**\*Corresponding authors:** Shujun Wang, shujunwang@sdut.edu.cn

Qing Liu, qingliu0315@163.com

Shaowen Xiang, Wendy202039@163.com

Yuying Liu, lyy999999@163.com

## 26 **Additional experimental section**

27 CA242, anti-CA242, and other cancer antigens used in this work were bought from  
28 Shanghai Linc-Bio Science Co. Ltd. 2,5-dimethoxyterephthaldehyde (DMTP) and 1,3,5-  
29 Tris(4-aminophenyl) benzene (TAPB) were obtained from Anhui Zesheng Technology  
30 Co., Ltd., Cadmium nitrate tetrahydrate ( $\text{Cd}(\text{NO}_3)_2 \cdot 4\text{H}_2\text{O}$ ), sodium sulfide 9-hydrate  
31 ( $\text{Na}_2\text{S} \cdot 9\text{H}_2\text{O}$ ), Tris (2-carboxyethyl) phosphine hydrochloride (TCEP) (3-aminopropyl)  
32 triethoxysilane were obtained from Shanghai Macklin Biochemical Technology Co.,  
33 Ltd. 1-(3-Dimethylaminopropyl)-3-ethylcarbodiimide hydrochloride (EDC), N-  
34 hydroxysuccinimide (NHS) and Bovine serum albumin (BSA, 96-99%) were obtained  
35 from Shanghai Aladdin Biochemical Technology Co.Ltd. Phosphate buffer solution  
36 (PBS, 0.1 mol/L  $\text{KH}_2\text{PO}_4$ , and 0.1 mol/L  $\text{Na}_2\text{HPO}_4$ ) was used during the  
37 electrochemical measurements.

38 X-ray diffraction (XRD) patterns were performed with D8S-3 advance X-ray  
39 diffractometer (Bruker AXS, Germany), transmission electronmicroscopy (TEM)  
40 images were taken by Tecnai G2 F20S-TWIN transmission electron microscope (Field  
41 Electron and Ion Co., United States). Scanning electron microscopy (SEM) images  
42 were taken by Quanta FEG250 field emission environmental electron microscope  
43 (Field Electron and Ion Co., United States). The F-4500 fluorescence  
44 spectrophotometer (Japan) was used to complete fluorescence emission spectrum. The  
45 electrochemical data were obtained by using CHI-660 electrochemical analyzer in  
46 standard three-electrode system with a glassy carbon electrode (GCE, diameter 4 mm)  
47 as the working electrode, The fluorescence emission spectrum was measured by F-380  
48 fluorescence spectrophotometer. All the chemical reagents were analytical grade and  
49 were directly used without further purification.

50

51

52

53

54 **Characterization of CdS NCs**

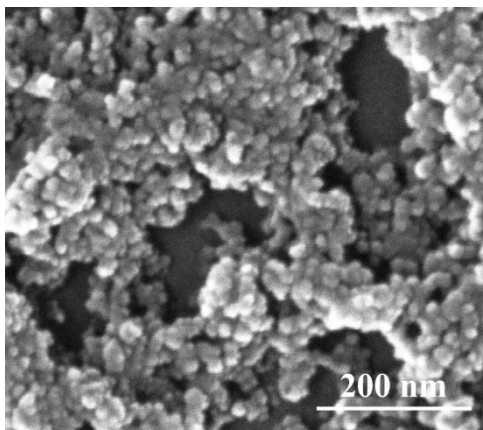

55

56

57

**Fig. S1.** SEM image of CdS NCs.

58 **ECL stability of CdS/GCE**

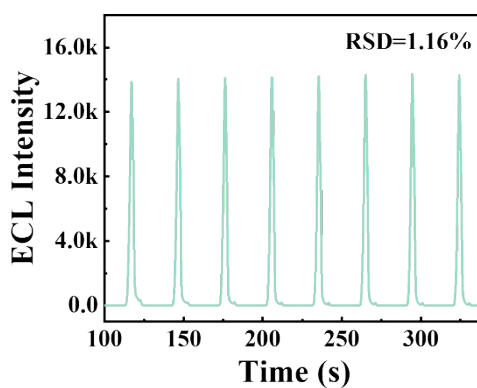

59

60 **Fig. S2.** The CdS/GCE continuous scanned for 8 cycles in PBS containing 40 mM  
61 H<sub>2</sub>O<sub>2</sub>.

62

63 **Electrochemical characterization of the immunosensor**

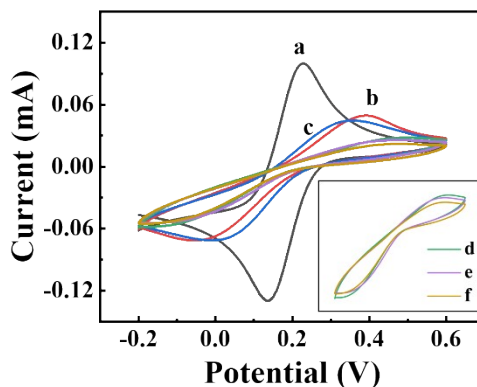

64

65 **Fig. S3.** (B) CV of (a) bare GCE, (b)CdS/GCE, (c) Ab1/CdS/GCE, (d)  
66 BSA/Ab1/CdS/GCE, (e) CA242/BSA/Ab1/CdS/GCE, (f) Ab2-

67 COFs/CA242/BSA/Ab1/CdS/GCE.

## 68 Optimization experiments

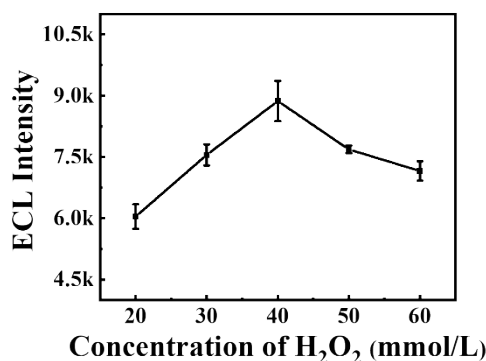

69

70

Fig. S3. The optimizations of H<sub>2</sub>O<sub>2</sub> concentration.

## 71 Limit of detection

72 The limit of detection can be calculated by a most common way and the equation  
73 as follow<sup>1</sup>:

74

$$X_L = X_{b1} + kS_{b1},$$

75 where  $X_L$  is derived from the smallest measure,  $X_{b1}$  is the mean of the blank  
76 measures,  $S_{b1}$  is the standard deviation of the blank measures and  $k$  is a numerical factor  
77 chosen according to the confidence level desired. A value of 3 for  $k$  in equation is  
78 strongly recommended, and it usually corresponds to a confidence level of about 90%  
79 in a practical sense. The values for  $X_L$  and  $S_{b1}$  cannot usually be determined from theory  
80 but must be found experimentally by making a sufficiently large number of  
81 measurements. In this work, after making twenty ECL measurements of blank, the  $X_{b1}$   
82 = 10798.6 and  $S_{b1} = 66.3$  was calculated. According to  $X_L = X_{b1} + 3S_{b1}$ , the  $X_L =$   
83 10997.5 was obtained, and the fitting equation of this proposed biosensor is  $I = 8185.75$   
84  $- 752.41 \times \lg c$ . Thus, the LOD of this proposed biosensor is  $c_L = 10^{(10997 - 8185.75)/(-752.41)}$   
85  $\approx 0.000183$  U/mL.

86

87

88

89

90

91

92 **Table S1.** Comparison of different methods for the detection of CA242

| Detection method                   | Linear range(U/mL) | Limit of Detection(U/mL) | Reference |
|------------------------------------|--------------------|--------------------------|-----------|
| Electrochemical biosensor          | 0.01-100           | 20                       | 2         |
| Electrochemical biosensor          | 0.001-10000        | 0.0015                   | 3         |
| AlphaLISA                          | 0.16-400           | 0.16                     | 4         |
| Electrochemiluminescence biosensor | 0.005-100          | 0.0019                   | 5         |
| Electrochemical biosensor          | 1-150              | 0.04                     | 6         |
| Electrochemiluminescence biosensor | 0.001-1000         | 0.000537                 | 7         |
| Electrochemiluminescence biosensor | 0.001-1000         | 0.000183                 | this work |

93

94 **Table S2.** The recovery analysis results (bovine serum sample).

| Concentration of CA242 in the sample (U/mL) | The addition (U/mL) | The detection (U/mL) | RSD (% , n=3) | Recovery (%) |
|---------------------------------------------|---------------------|----------------------|---------------|--------------|
| 0.55                                        | 1                   | 1.73, 1.56, 1.52     | 6.9           | 105.4        |
|                                             | 2                   | 2.33, 2.59, 2.46     | 5.3           | 95.6         |
|                                             | 3                   | 3.41, 3.71, 3.91     | 3.0           | 104.0        |

95

96 **Table S3.** The recovery analysis results (human serum sample).

| Concentration of CA242 in the sample (U/mL) | The addition (U/mL) | The detection (U/mL) | RSD (% , n=3) | Recovery (%) |
|---------------------------------------------|---------------------|----------------------|---------------|--------------|
| 0.55                                        | 1                   | 1.53, 1.61, 1.48     | 4.3           | 99.3         |
|                                             | 2                   | 2.54, 2.29, 2.67     | 7.6           | 97.5         |
|                                             | 3                   | 3.60, 3.74, 3.81     | 3.0           | 105.7        |

97 **References**

- 98 1. K. Ren, J. Wu, F. Yan, Y. Zhang and H. Ju, *Biosens. Bioelectron.*, 2015, **66**, 345-349.
- 99 2. Y. Zheng, L. Zhao and Z. Ma, *Biosens. Bioelectron.*, 2018, **115**, 30-36.
- 100 3. X. Du, X. Zheng, Z. Zhang, X. Wu, L. Sun, J. Zhou and M. Liu, *Nanomaterials*, 2019, **9**,  
101 1335.
- 102 4. J. Chen, B. Fu, Z. Xiang, X. Chen, L. Wang, Y. Qin, X. Zhao, X. Zhou, P. Liu and B.  
103 Huang, *J. Immunol.*, 2023, **517**, 113487.
- 104 5. H. Dong, S. Liu, Q. Liu, Y. Li, Z. Xu, Y. Li and Q. Wei, *Anal. Chem.*, 2022, **94**, 12852-  
105 12859.
- 106 6. Q. Rong, F. Feng and Z. Ma, *Biosens. Bioelectron.*, 2016, **75**, 148-154.
- 107 7. F. Xie, C. Shen, X. Li, P. Xiao, S. Wang, Y. Li, H. Sun, P. Wang, Y. Li and Q. Liu,  
108 *Talanta*, 2024, **273**, 125956.
- 109
